# Supplementary material for: Improving the Efficiency of Antimicrobial Stewardship Action in Acute Care Facilities
Source: PubMed Central journal article supplement — Open Forum Infect Dis. 2023 Aug 1;10(9):ofad412. doi: 10.1093/ofid/ofad412 (PMC10478156; doi:10.1093/ofid/ofad412), 2023-08-01
Supplement: ofad412_supplementary_data.pdf [file ofad412_supplementary_data.pdf]

Table S1. The Antimicrobial Stewardship Initiative Prioritization Tool

| Initiative | Initiative Type?         |                          |                          | Impact                                                      |                                                                         |                                                                                                                          |                                                                                   | Feasibility                                                              | Actionability                                                                                    | Measurability                             | Priority                |                  |
|------------|--------------------------|--------------------------|--------------------------|-------------------------------------------------------------|-------------------------------------------------------------------------|--------------------------------------------------------------------------------------------------------------------------|-----------------------------------------------------------------------------------|--------------------------------------------------------------------------|--------------------------------------------------------------------------------------------------|-------------------------------------------|-------------------------|------------------|
|            |                          |                          |                          | Gap between Current Clinician Practices and Best Practices? | Impact of Suboptimal Practices on Individual Patient Care? <sup>a</sup> | How Common are the Infectious Syndromes Affected by this Initiative?                                                     | Address a Regulatory Priority (e.g. CMS, Joint Commission, local administration)? | Feasibility of Building Functional Targeted Alert(s) for the Initiative? | Likely Actionability of Targeted Alert(s)?                                                       | Measurability of Initiative Outcomes?     | Risk Score <sup>b</sup> | Priority Rank    |
|            | PAF                      | PRA                      | Other                    | 1 = Small<br>2 = Moderate<br>3 = Large                      | 1 = Low<br>2 = Moderate<br>3 = High                                     | 1 = Less Common (CDI, IE, Osteomyelitis)<br><br>2 = Moderately Common (BSI, IAI)<br><br>3 = Very Common (PNA, UTI, SSTI) | 1 = No<br>2 = Yes                                                                 | 1 = Difficult<br>2 = Moderate<br>3 = Easy                                | 1 = Low (≤33% of alerts)<br><br>2 = Moderate (34-66% of alerts)<br><br>3 = High (≥67% of alerts) | 1 = Difficult<br>2 = Moderate<br>3 = Easy | Total                   | 1 = Highest Rank |
|            | <input type="checkbox"/> | <input type="checkbox"/> | <input type="checkbox"/> |                                                             |                                                                         |                                                                                                                          |                                                                                   |                                                                          |                                                                                                  |                                           |                         |                  |
|            | <input type="checkbox"/> | <input type="checkbox"/> | <input type="checkbox"/> |                                                             |                                                                         |                                                                                                                          |                                                                                   |                                                                          |                                                                                                  |                                           |                         |                  |
|            | <input type="checkbox"/> | <input type="checkbox"/> | <input type="checkbox"/> |                                                             |                                                                         |                                                                                                                          |                                                                                   |                                                                          |                                                                                                  |                                           |                         |                  |
|            | <input type="checkbox"/> | <input type="checkbox"/> | <input type="checkbox"/> |                                                             |                                                                         |                                                                                                                          |                                                                                   |                                                                          |                                                                                                  |                                           |                         |                  |

BSI = bloodstream infection; CDC = Centers for Disease Control and Prevention; CDI = *Clostridioides difficile* infection; CMS = Centers for Medicare and Medicaid Services; IAI = intraabdominal infection; IE = infective endocarditis; PAF = prospective audit and feedback; PNA = pneumonia; PRA = preauthorization; SSTI = skin and soft tissue infection; UTI = urinary tract infection

<sup>a</sup> Scale: 1 = Low (no increased length of stay, readmission, morbidity, and/or mortality), 2 = Moderate (mild-moderate increased length of stay, readmission, morbidity and/or mortality), 3 = High (markedly increased length of stay, readmission, morbidity and/or mortality)

<sup>b</sup> Risk Score Analysis: Low Priority ≤ 8, Moderate Priority 9-14, High Priority ≥ 15 points
